# Supplementary material for: Identification of disulfidptosis-related molecular subtypes in pleural mesothelioma demonstrates a correlation with the immune infiltration, prognosis and therapy efficacy
Source: Research Square preprint supplement (doi:10.21203/rs.3.rs-7843695/v1), 2025-11-25
Supplement: Supplementary file 1 [file b5f1921ac6a1bb9e94a34db4.docx]

Supplementary Material

The identification of disulfidptosis related molecular subtypes in pleural mesothelioma demonstrates a correlation with the immune infiltration, prognosis and therapy efficacy

Jing Ding1, Xuefeng Huang1,2, WenX Yao1, TongY Lin1*

*** Correspondence:** Tongyu Lin, Department of Medical Oncology, Sichuan Cancer Hospital & Institute, Sichuan Cancer Center, School of Medicine, University of Electronic Science and Technology of China, No.55, Section 4, Renmin South Road, Chengdu, Sichuan, People’s Republic of China. Email: linty@sysucc.org.cn. Tel:+86-28-85420656.

# Supplementary Figures and Tables

## Supplementary Figures


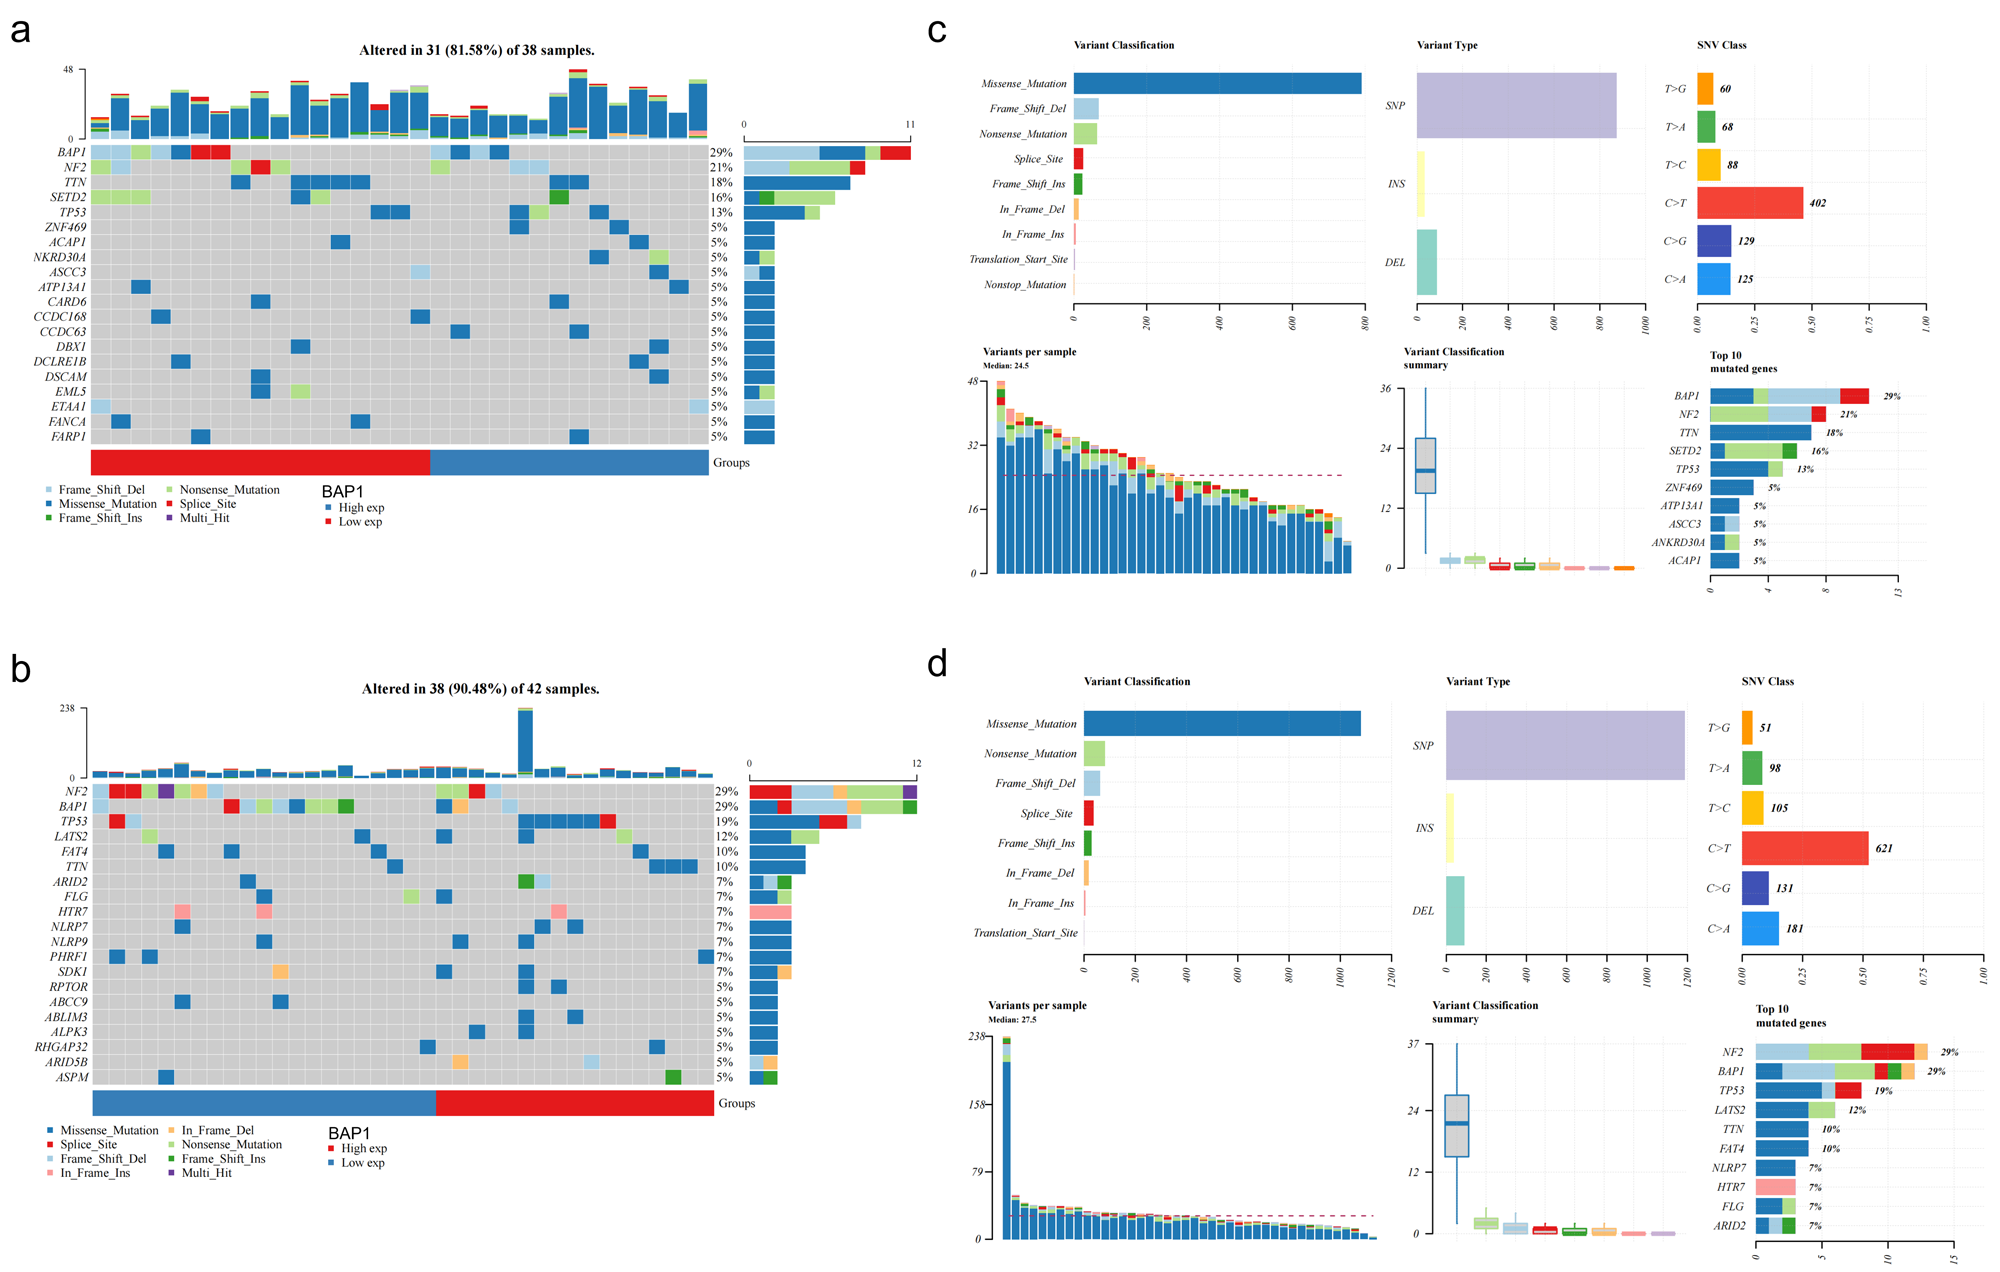


Supplementary Figure . Genetic Mutation Landscape in Different subtypes Based on Disulfidptosis of PM

a-b) The landscape of mutation profiles between high- and low- BAP1 expression in different subtypes of PM is presented in a waterfall plot, which displays the mutation information of each gene in each sample. c-d) The cohort summary plot illustrates the distribution of variants according to variant classification, type, and SNV class in different subtypes of PM. PM, pleural mesothelioma; SNV, single nucleotide variant.


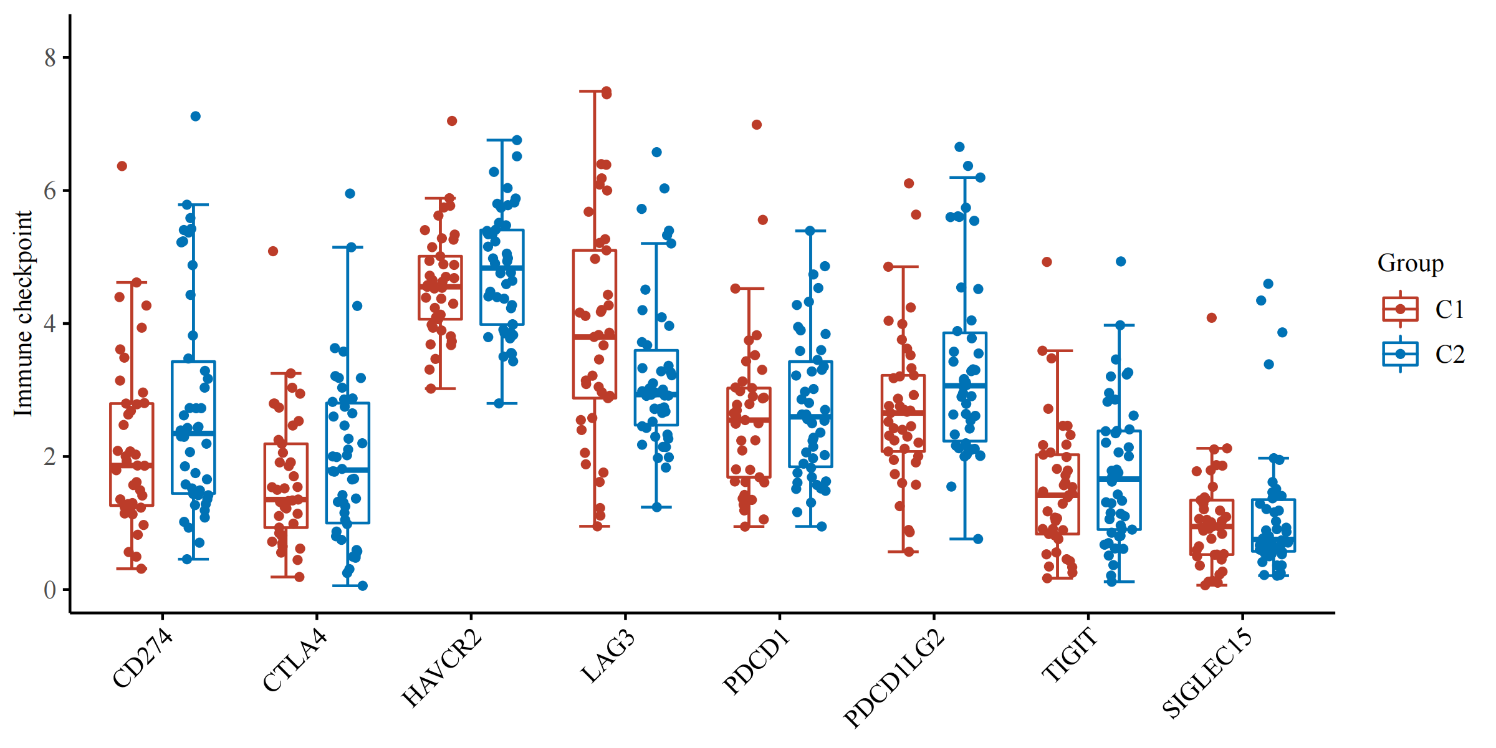


Supplementary Figure 2. Immune Checkpoints expression between two clusters in PM.


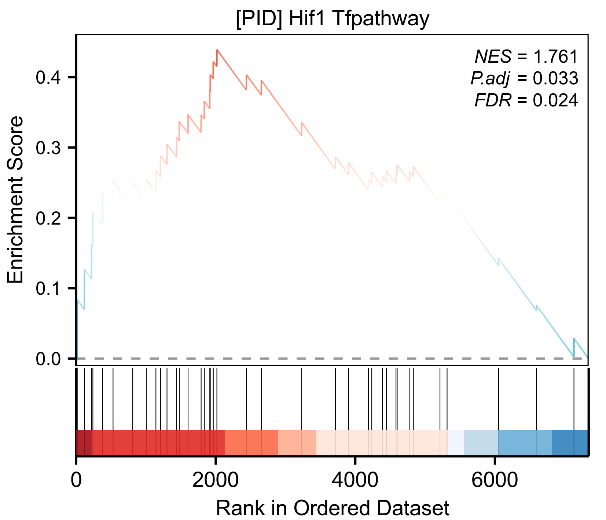


Supplementary Figure 3. GSEA shows HIF1 TF pathway upregulation in cluster 2 of PM.

## Supplementary Tables

# Table 1. Univariate Cox regression analysis of 11 prognostic genes selected by LASSO. P values were adjusted for multiple testing using the Benjamini–Hochberg FDR method.

| Gene | Hazard Ratio | 95% CI Lower | 95% CI Upper | P value | q value |
| --- | --- | --- | --- | --- | --- |
| ADH1B | 0.78061 | 0.70657 | 0.86239 | 0.00010 | 0.00010 |
| ARHGEF26 | 1.50701 | 1.28172 | 1.77190 | 0.00010 | 0.00010 |
| CDCA2 | 2.34737 | 1.78335 | 3.08975 | 0.00010 | 0.00010 |
| HACD2 | 1.93479 | 1.53876 | 2.43275 | 0.00010 | 0.00010 |
| HAPLN1 | 1.38712 | 1.23434 | 1.55882 | 0.00010 | 0.00010 |
| HPR | 0.55759 | 0.42412 | 0.73306 | 0.00003 | 0.00010 |
| LMNB2 | 3.10827 | 2.14789 | 4.49805 | 0.00010 | 0.00010 |
| LOXL2 | 1.51794 | 1.31647 | 1.75025 | 0.00010 | 0.00010 |
| OXTR | 1.32560 | 1.19719 | 1.46779 | 0.00010 | 0.00010 |
| SULT1B1 | 1.50107 | 1.26794 | 1.77706 | 0.00010 | 0.00010 |
| TROAP | 1.93367 | 1.54383 | 2.42194 | 0.00010 | 0.00010 |

# Abbreviation: FDR, false discovery rate; q-value, adjusted p-value.
